# Supplementary material for: TiO2-modified MoS2 monolayer films enable sensitive NH3 sensing at room temperature
Source: Royal Society of Chemistry journal article supplement (doi:10.1039/d3nr02469e), 2023-01-01
Supplement: d3nr02469e1.pdf [file d3nr02469e1.pdf]

## Supplementary information

### **TiO<sub>2</sub>-Modified MoS<sub>2</sub> Monolayer Films Enables Sensitive NH<sub>3</sub> Sensing at Room Temperature**

*Lun Tan,<sup>1,2#</sup>, Xianzhen Liu<sup>1#</sup>, Peng Wu<sup>2</sup>, Liwei Cao<sup>2</sup>, Wei Li<sup>2</sup>, Ang Li<sup>2,\*</sup>, Zhao Wang<sup>1,\*</sup>, Haoshuang Gu<sup>1,\*</sup>*

<sup>1</sup>Hubei Engineering Research Center for Safety Detection and Control of Hydrogen Energy - Hubei Key Laboratory of Micro-Nanoelectronic Materials and Devices, School of Microelectronics, Hubei University, Wuhan 430062, P.R. China.

<sup>2</sup>Institute of Microstructure and Properties of Advanced Materials, Beijing University of Technology, Beijing, 100124, P.R. China

\*Corresponding authors, E-mail: [wangzhao@hubu.edu.cn](mailto:wangzhao@hubu.edu.cn); [ang.li@bjut.edu.cn](mailto:ang.li@bjut.edu.cn); [guhsh@hubu.edu.cn](mailto:guhsh@hubu.edu.cn)

# Both authors contribute equally to this work.

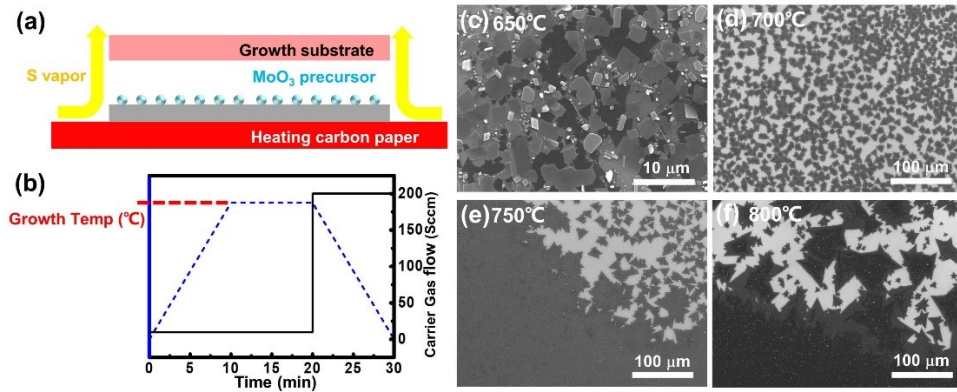

**Fig.S1** The growth of monolayer MoS<sub>2</sub> films. (a) Schematic of the CVD apparatus. (b) Temperature profile and Ar flow during the growth process. (d-f) The SEM images of MoS<sub>2</sub> grown at 650°C, 700°C, 750°C and 800°C, respectively. The morphology of MoS<sub>2</sub> at different growth temperature in 10 min is shown in **Fig S1**. When the temperature is below 700°C, many separate irregular polygonal-like crystals can be seen in **Fig S1(c)**. The Raman spectrum of those small crystals is corresponding to the MoO<sub>2</sub> and MoOS<sub>2</sub> which are the intermediate product during the growth of MoS<sub>2</sub> because of incomplete sulfurization at low temperature as shown in Fig S2. When the temperature reaches to 700°C, there are many separate MoS<sub>2</sub> crystals on substrate. The Raman spectrum of those small crystals in **Fig S2(a)** shows the E<sub>2g</sub> and A<sub>1g</sub> peaks of MoS<sub>2</sub>, the frequency difference ( $\Delta k$ ) between the E<sup>l</sup><sub>2g</sub> and A<sub>1g</sub> peaks is  $\sim 20 \text{ cm}^{-1}$ , which is corresponding to the monolayer MoS<sub>2</sub>. The MoS<sub>2</sub> crystals gradually connects into continuous polycrystalline films, when temperature rises to 750°C due to the accelerated reaction rate at high

temperature. At 800°C,  $\Delta k$  of films is  $\sim 24 \text{ cm}^{-1}$  in Fig S2, which indicated that the films are multilayer MoS<sub>2</sub> films. The rapid evaporation of MoO<sub>3</sub> makes the pressure of MoO<sub>3</sub> higher on the surface of substrates, which results in the growth of multilayer MoS<sub>2</sub> as reported in ref.1.<sup>[1]</sup>

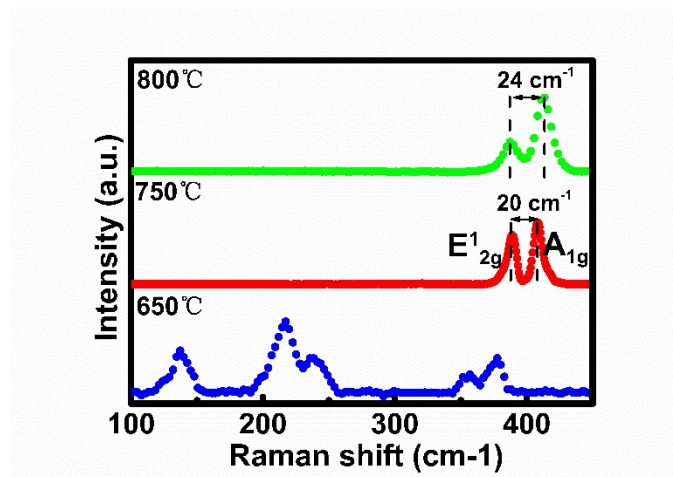

**Fig.S2** The Raman spectrum of production grown at 650°C, 750°C and 800°C, respectively.

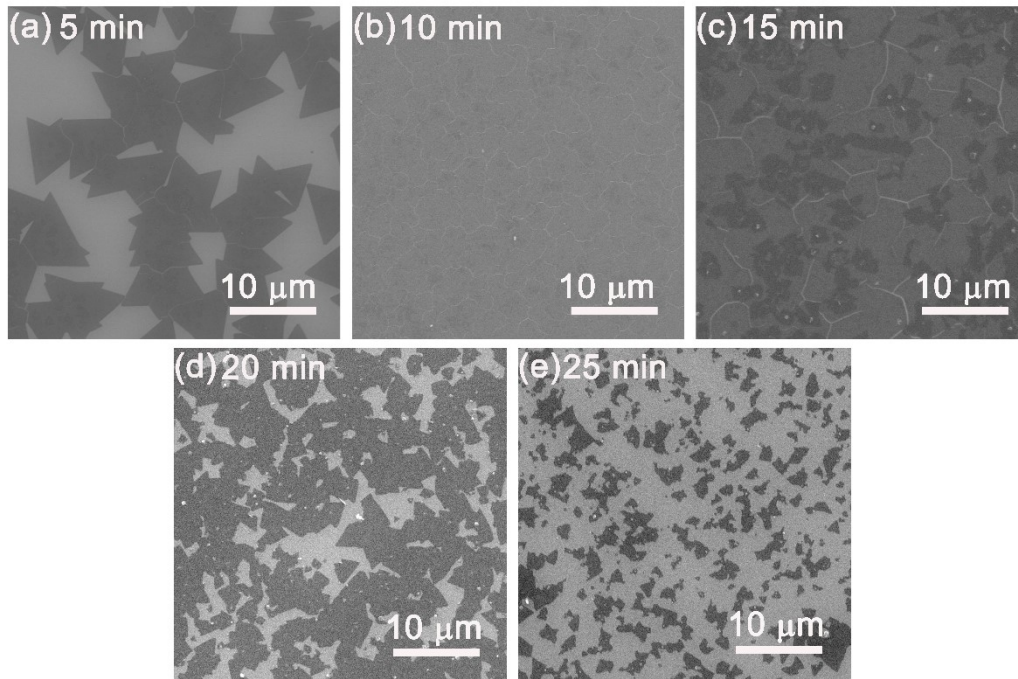

**Fig.S3** SEM images of MoS<sub>2</sub> films at different growth time. When the growth time is shorter than 5 min, there are separated triangle-like MoS<sub>2</sub> nanoflakes on substrate. When the growth time is extended to 10 min, the separated MoS<sub>2</sub> nanoflakes connected into polycrystalline films. The new nuclei will form on the surface of MoS<sub>2</sub> films with the further increase of growth time, which lead to the increase of the thickness of MoS<sub>2</sub> films. Once the growth time exceeds 20 min, there are some pores on the MoS<sub>2</sub> films because of the poor thermal-stability of MoS<sub>2</sub> films in S insufficient environment.

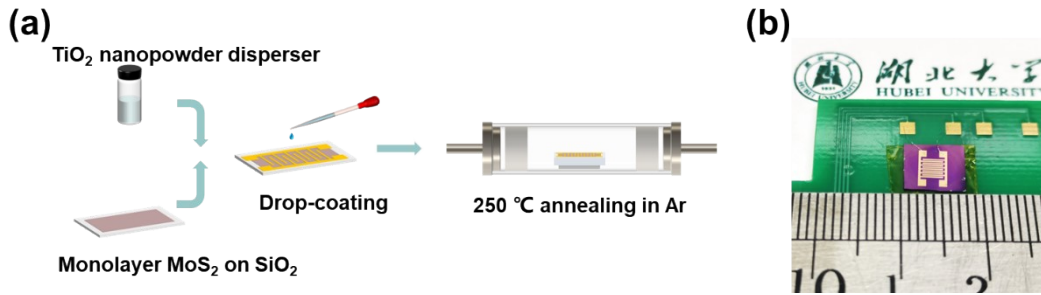

**Fig. S4** Fabrication and photography of TiO<sub>2</sub> modifying MoS<sub>2</sub> monolayer films sensors. (a) the device was annealed at 250°C in Ar for contacting tightly. (b) Photograph of a monolayer MoS<sub>2</sub> films with interdigitated electrodes.

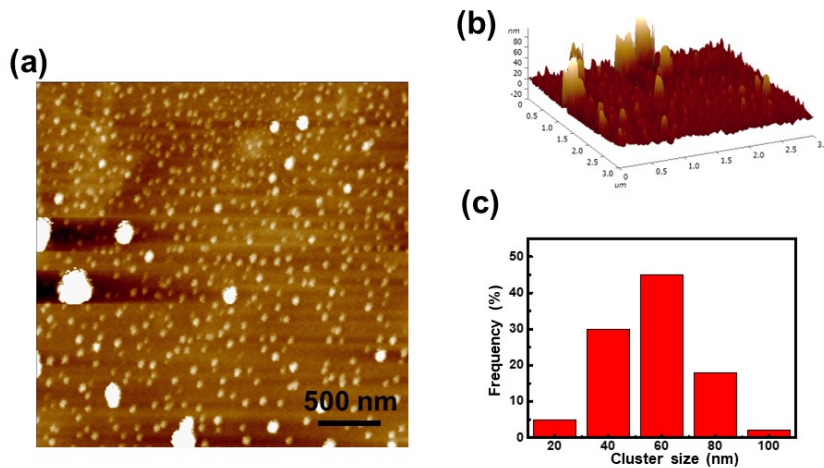

**Fig. S5** AFM images of 10 nmol/cm<sup>2</sup> TiO<sub>2</sub> modifying monolayer. (a) and (b) represent the 2D and 3D AFM images of sensors. (c) particle size distribution of TiO<sub>2</sub> nanoparticles. The TiO<sub>2</sub> nanoparticles are uniformly distributed on the surface of monolayer MoS<sub>2</sub> films except for several big cluster (>100 nm). The average size of about those nanoparticles is about 55 nm.

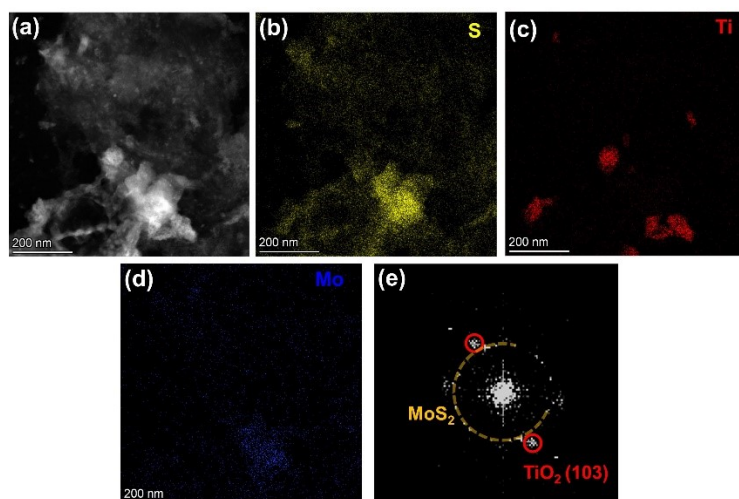

**Fig. S6** HADDF images and EDS elements mappings of hybrid. It is clearly that the MoS<sub>2</sub> is wide distributed. the sample was obtained by scraping from the substrate, which led to the cluster and wrinkle of MoS<sub>2</sub> films. Therefore, there are few large area uniform flat MoS<sub>2</sub> films on carbon films. The size of TiO<sub>2</sub> nanoparticle is about 50 nm, which is consistent with the result obtained by AFM. **Fig S6 (e)** is the selected area electron diffraction (SAED) pattern of the **Fig 2(a)**.

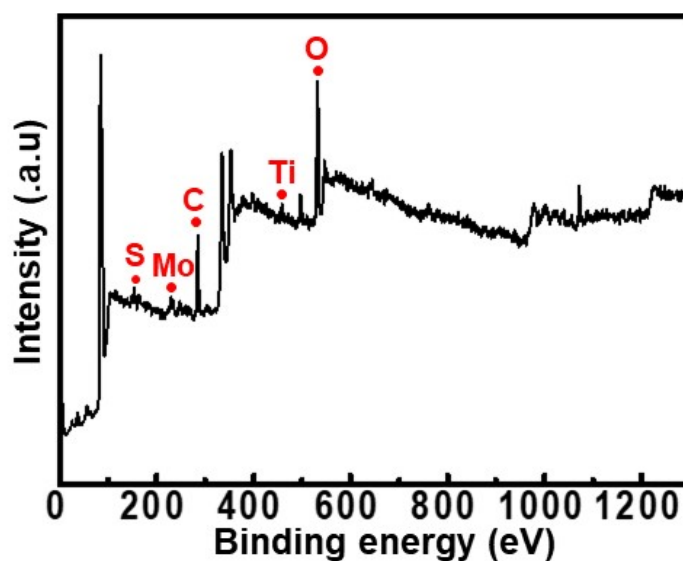

**Fig. S7** The XPS spectrum of TiO<sub>2</sub> nanoparticles modifying monolayered MoS<sub>2</sub> films.

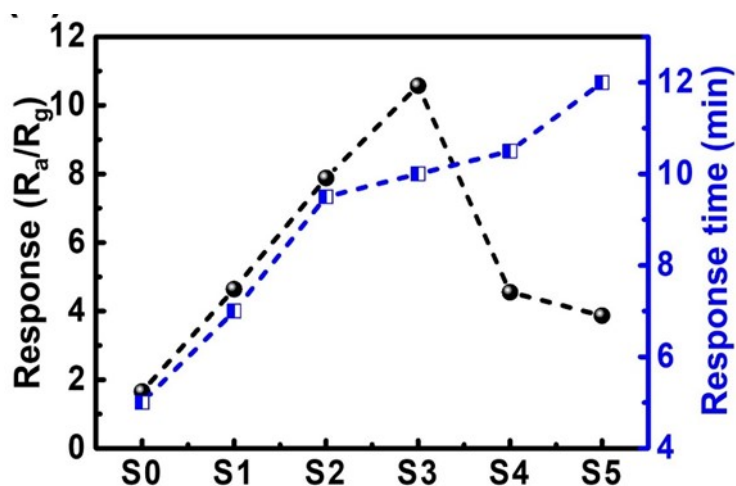

**Fig. S8** Comparison of sensor response and response time of different sensors towards 500 ppm of ammonia in air. The response time varied from 5 min to 12 min with the increase amount of  $\text{TiO}_2$  nanoparticles. -

**Table. S1** Linear fit of each sensor towards 50-1000 ppm. the  $R^2$  is greater than 0.94, indicating that the response of each sensor has a good linear relationship with the concentration of  $\text{NH}_3$  from 50-1000 ppm.

| Sample | $R^2$ | slope  |
|--------|-------|--------|
| S0     | 0.94  | 0.0020 |
| S1     | 0.95  | 0.0101 |
| S2     | 0.96  | 0.0111 |
| S3     | 0.98  | 0.0150 |
| S4     | 0.96  | 0.0082 |



|    |      |        |
|----|------|--------|
| S5 | 0.98 | 0.0050 |
|----|------|--------|

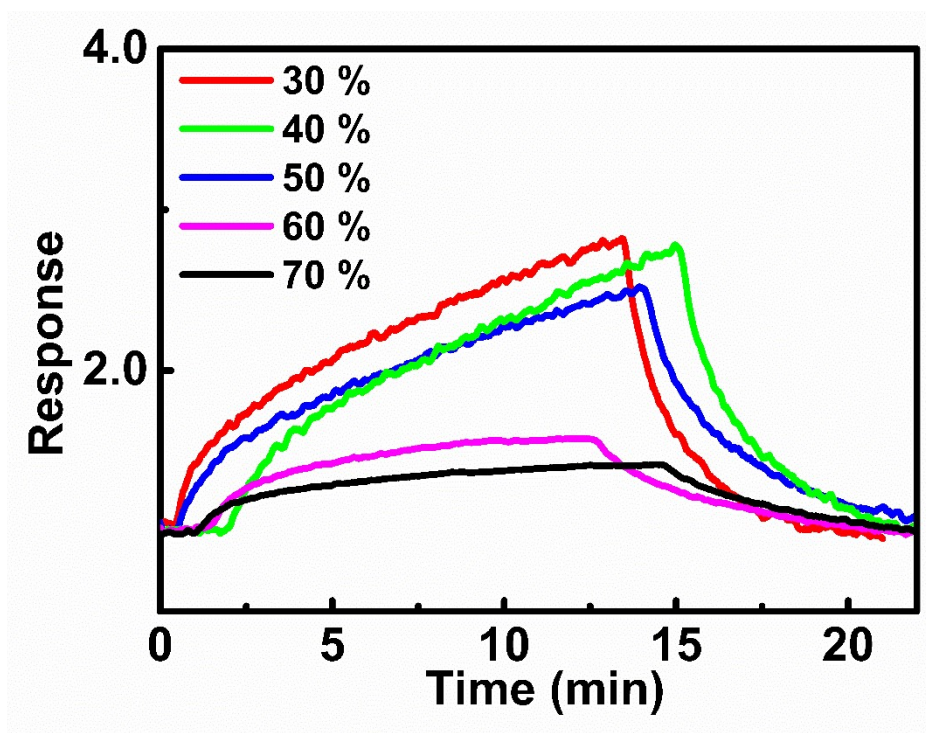

**Fig. S9** The dynamic response of 30 nmol/cm<sup>2</sup> TiO<sub>2</sub> nanoparticles modifying monolayer MoS<sub>2</sub> films towards 50 ppm NH<sub>3</sub> at different humidity.



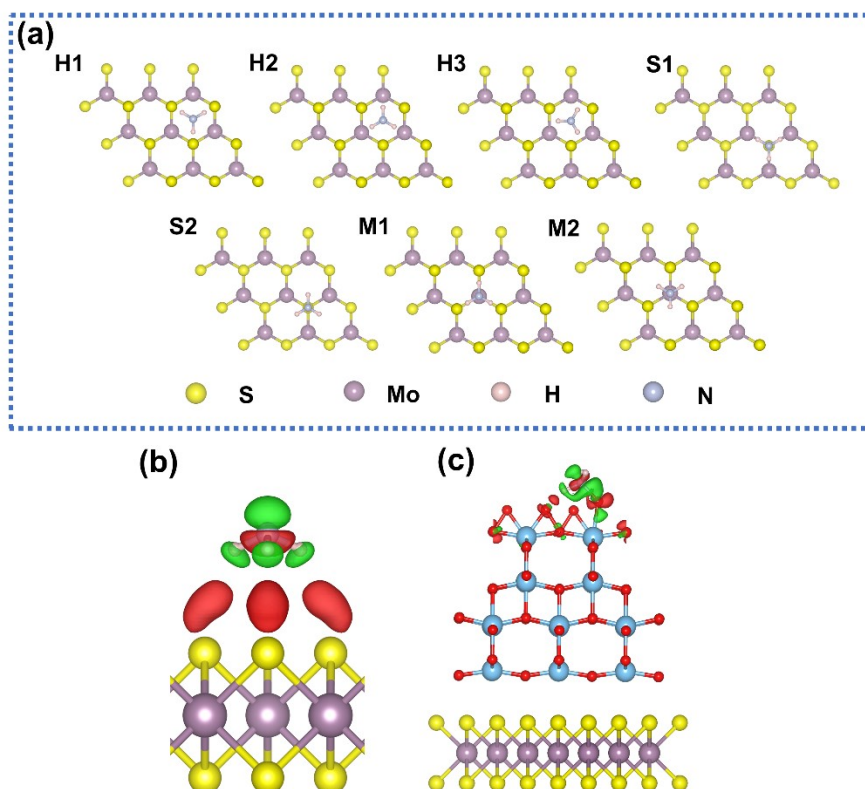

**Fig. S10** DFT calculation details. (a) Top view of a monolayer MoS<sub>2</sub> showing hole top, S top and Mo top for N(NH<sub>3</sub>) adsorption. (b) and (c) are isosurface plot of the electron charge density difference for NH<sub>3</sub> on monolayer MoS<sub>2</sub> and TiO<sub>2</sub>-MoS<sub>2</sub> respectively. To study the adsorption of NH<sub>3</sub> on the MoS<sub>2</sub>, 3 × 3 × 1 supercell of 2H-MoS<sub>2</sub> was built as shown in **Fig S10(a)**. A large vacuum layer of 15 Å was used to avoid interlayer interactions. A plane wave cutoff of 450 eV was consistently used during the whole process. In the process of geometry optimization, the convergency of energy and atomic force were 10<sup>-5</sup> eV and 0.03 eV/Å, respectively. A Monkhorst-Park mesh of 3 × 3 × 1 for the Brillouin zone integration was employed. The adsorption energy of NH<sub>3</sub> molecules on MoS<sub>2</sub> was calculated using  $E_{ads} = E_{total} - (E_{MoS_2 \text{ or } TiO_2-MoS_2} + E_{NH_3})$ , where

$E_{total}$  is the total energy of the  $\text{NH}_3$  molecules on  $\text{MoS}_2$  (or  $\text{TiO}_2\text{-MoS}_2$ ) surface system,  $E_{\text{MoS}_2}$  ( $E_{\text{TiO}_2\text{-MoS}_2}$ ) is the energy of monolayered  $\text{MoS}_2$  ( $\text{TiO}_2\text{-MoS}_2$ ),  $E_{\text{NH}_3}$  is the energy of isolated  $\text{NH}_3$  molecule.

To explore the underlying mechanism of the significant resistance changes upon the adsorption of  $\text{NH}_3$  molecules on  $\text{MoS}_2$ , DFT calculation was carried to analysis the  $\text{NH}_3$  adsorption on  $\text{MoS}_2$  as shown in **Fig. S10**. There are seven absorption sites are listed in **Fig S10(a)** which are depended on the sites of N and orientation of N-H bond. Table S2 shows the absorption energy of  $\text{NH}_3$  molecules on each site. It is clearly that the absorption energy of H atoms near S (M1 and H1) are lower than far one (S1 and S2), which indicate that the absorption site of H in  $\text{NH}_3$  molecule atom close S atom is more stable. this is consistent with the charge density difference of absorption system in **Fig. S10(b)** because the obvious charge transfer between H and S atoms. The blue area and red area represent electrons depletion and accumulation, respectively. It is clearly shown that the electrons were transferred from  $\text{NH}_3$  to  $\text{MoS}_2$ , which resulted in the decrease of the resistance when  $\text{MoS}_2$  exposed to  $\text{NH}_3$  and this is consistent with the experimental results of bare  $\text{MoS}_2$  films towards  $\text{NH}_3$ . Obviously, the N atom on the Mo top and the H atom orienting to S atom has small absorption energy, which is consistent with the result of the easily charge transferring between S and H atoms in **Fig S10 (a)**. Isosurface plot of the electron charge density difference for  $\text{NH}_3$  on  $\text{TiO}_2\text{-MoS}_2$  is shown in the

**Fig. S10(c).** It shows that the  $\text{NH}_3$  molecule interact with O atoms of  $\text{TiO}_2$ , which may cause the decrease of sensor resistance. The table S2 shows the absorption energy of  $\text{NH}_3$  molecule absorbed on the surface of  $\text{MoS}_2$  and  $\text{TiO}_2\text{-MoS}_2$ , respectively. The adsorption energy is smaller when ammonia molecule adsorbed on the  $\text{TiO}_2\text{-MoS}_2$  surface, indicating that ammonia molecule is more easily adsorbed on the  $\text{TiO}_2$  surface than on  $\text{MoS}_2$  surface since  $\text{TiO}_2$  has more active sites.

**Table. S2** The adsorption energy of  $\text{NH}_3$  molecule on different site of  $\text{MoS}_2$  and  $\text{TiO}_2\text{-MoS}_2$ .

| Absorption sites      | H1     | H2     | H3     | S1     | S2     | M1     | M2     | $\text{TiO}_2\text{-MoS}_2$ |
|-----------------------|--------|--------|--------|--------|--------|--------|--------|-----------------------------|
| $E_{\text{abs}}$ (eV) | -0.170 | -0.166 | -0.167 | -0.110 | -0.107 | -0.172 | -0.166 | -0.69                       |

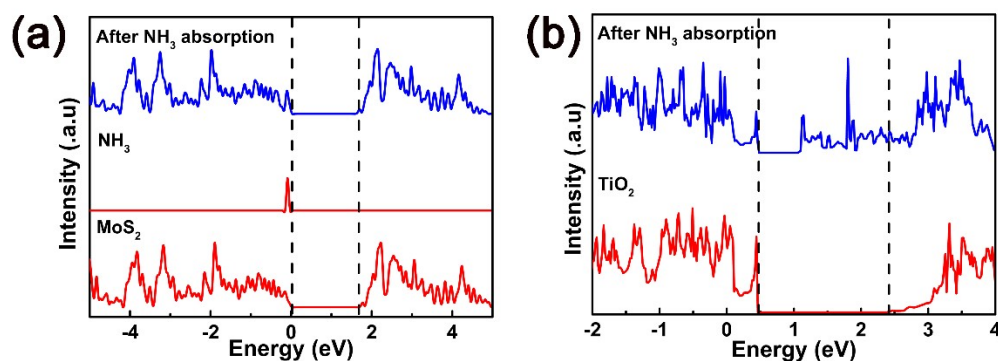

**Fig. S11.** The LDOS (local density of states) of before and after NH<sub>3</sub> absorption on MoS<sub>2</sub> (a) and TiO<sub>2</sub> (b). The absorption of NH<sub>3</sub> molecules result in several distinct states at the valence bands, which is close to that of pristine MoS<sub>2</sub> without NH<sub>3</sub> absorption. Therefore, the NH<sub>3</sub> absorption don't have a substantial effect on the electronic structures of MoS<sub>2</sub>. Before the adsorption of the NH<sub>3</sub> molecules, the band gap of the TiO<sub>2</sub> is  $\sim$  2 eV according to the calculation results, as shown in the **Fig S11**. After the NH<sub>3</sub> absorption, new electron states can be found in the band gap of TiO<sub>2</sub> according to the calculation results, which can be attributed to that NH<sub>3</sub> molecule interact with O atoms and finally lead to the narrowing of band gap to 0.7 eV. According to the first principle calculation results, the surface adsorption of NH<sub>3</sub> on TiO<sub>2</sub> will have a strong impact on the electron structure of the TiO<sub>2</sub>, which may lead to the variation of the electrical transportation behavior of the TiO<sub>2</sub> host materials.

## Reference

- [1] J. Wei, J.-K. Huang, J. Du. Effect of the geometry of precursor crucibles on the growth of MoS<sub>2</sub> flakes by chemical vapor deposition. *New Journal of Chemistry*. 2020, **44**, 21076-21084.
